# Supplementary material for: Highly selective two-electron oxygen reduction to generate hydrogen peroxide using graphite felt modified with N-doped graphene in an electro-Fenton system
Source: Royal Society of Chemistry journal article supplement (doi:10.1039/c9nj02601k), 2019-01-01
Supplement: c9nj02601k1.pdf [file c9nj02601k1.pdf]

## Supporting Information

Highly selective two-electron oxygen reduction to hydrogen peroxide using graphite felt modified with N-doped graphene in electro-Fenton system

Guishu Li<sup>ab</sup>, Yonggang Zhang<sup>\*ab</sup>

<sup>a</sup>State Key Laboratory of Separation Membranes and Membrane Processes, Tianjin Polytechnic University, Tianjin 300387, China

<sup>b</sup>School of Environmental Science and Engineering, Tianjin Polytechnic University, Tianjin 300387, China

**Table S1** Types and contents of nitrogen in graphene and N-graphene

| Sample     | C(%)  | O(%)  | N(%) |
|------------|-------|-------|------|
| graphene   | 85.58 | 14.21 | 0.21 |
| N-graphene | 88.30 | 4.71  | 6.99 |

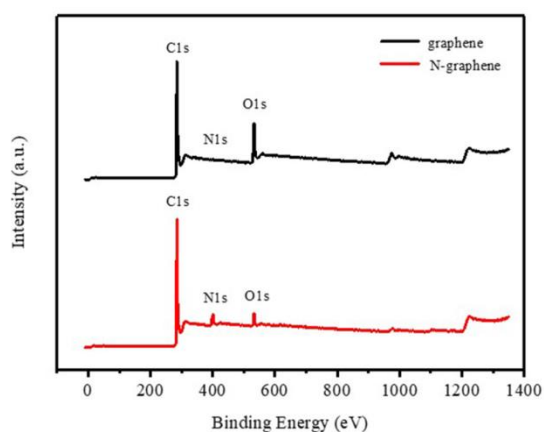

**Fig.S1** XPS spectrum of graphene and N-graphene.

\*Corresponding author.

E-mail address: [zhangyonggang1895@163.com](mailto:zhangyonggang1895@163.com) (Y. Zhang)

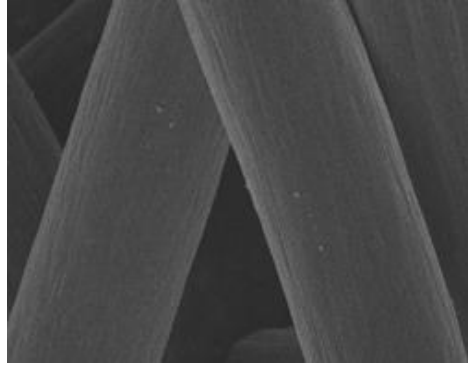

**Fig.S2** SEM image of GF.
